# Supplementary material
Source: PubMed Central journal article supplement (PMC5932136)
Supplement: NIHMS941141-supplement-1.pdf [file NIHMS941141-supplement-1.pdf]

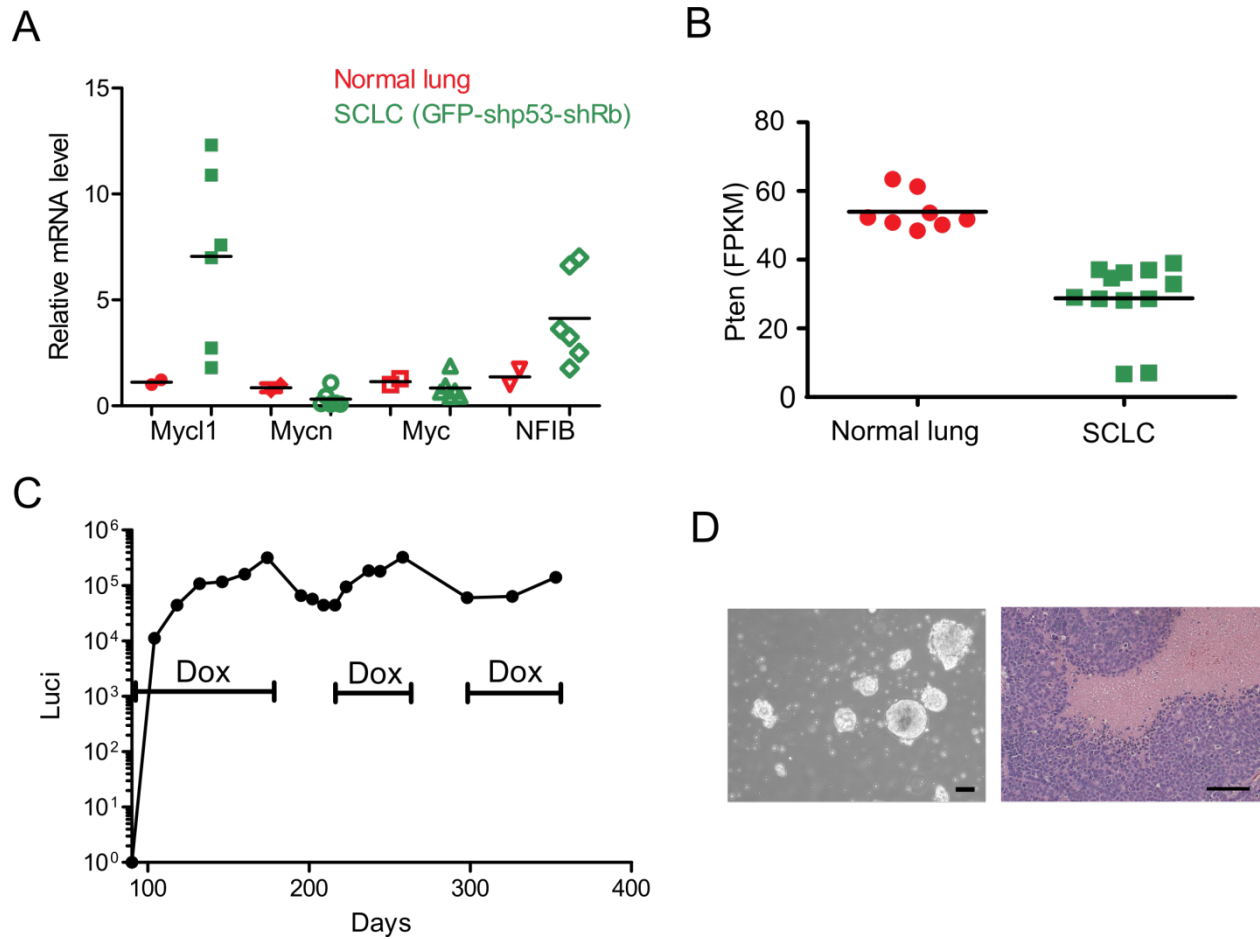

**Supplementary Figure S1. Characterizing the SCLC mouse model.** (A) Expression of Mycl1, Mycn, Myc and NFIB was examined by quantitative RT-PCR in normal lung and SCLC samples induced with GFP-shp53-shRb vector. Results showed up-regulation of Mycl1 and NFIB expression. (B) Pten was found down-regulated in SCLC samples according to RNAseq result. (C) SCLC was induced with TRE-luci-2A-Mycl1-shp53-shRb vector. Tumor load was estimated by IVIS imaging. Once doxycycline was withdrawn, the tumor size shank. In case of doxycycline-withdrawal, doxycycline chow was put back 2 days before the IVIS imaging to ensure the expression of luciferase gene. The results suggested the tumor dependence on Mycl1 expression. (D) Suspension culture of primary SCLC cells isolated from the mouse model. These cells could be transplanted into syngeneic hosts and form tumors with exact histopathology as primary tumors. Scale bars, 100  $\mu$ m.
