# Supplementary material
Source: PubMed Central journal article supplement (PMC5932136)
Supplement: NIHMS941141-supplement-2.pdf [file NIHMS941141-supplement-2.pdf]

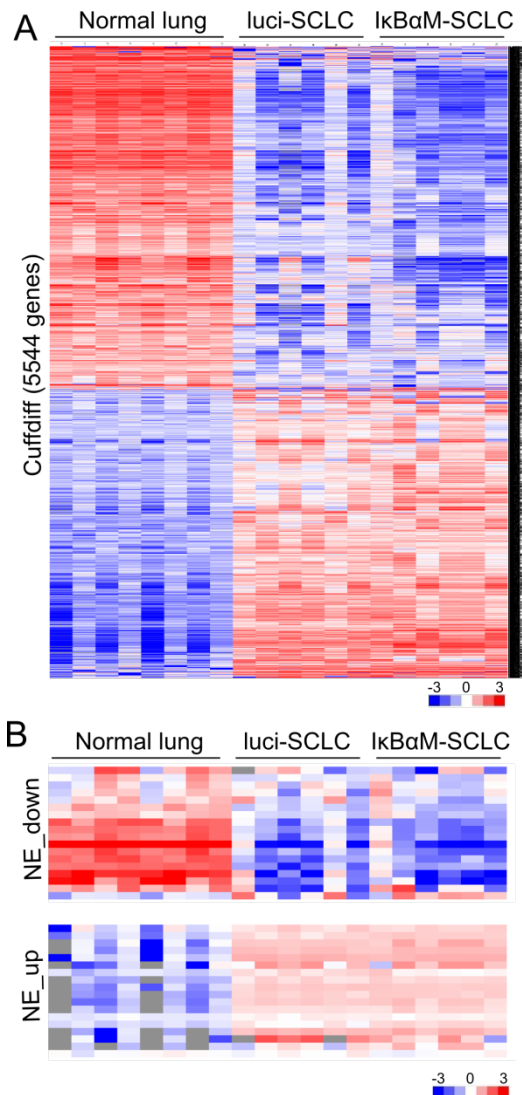

**Supplementary Figure S2. RNAseq analysis of normal lung, control tumors (luci) and IκBαM tumors.** (A) Heatmap of the expression values of 5544 genes (significantly expressed in normal lung vs. SCLC tumors., called by Cuffdiff) in normal lung, luci tumor and IκBαM tumor. There were basically little differences between IκBαM tumors and control tumors. (B) Heatmap of the expression values of 18 NE\_up and 18 NE\_down genes (defined by Berns group, *Cancer Cell*. 2011. **19**:244-256) in normal lung, luci tumor and IκBαM tumor. Again, little differences were identified between IκBαM tumors and control tumors.
