# Supplementary material
Source: PubMed Central journal article supplement (PMC5932136)
Supplement: NIHMS941141-supplement-3.pdf [file NIHMS941141-supplement-3.pdf]

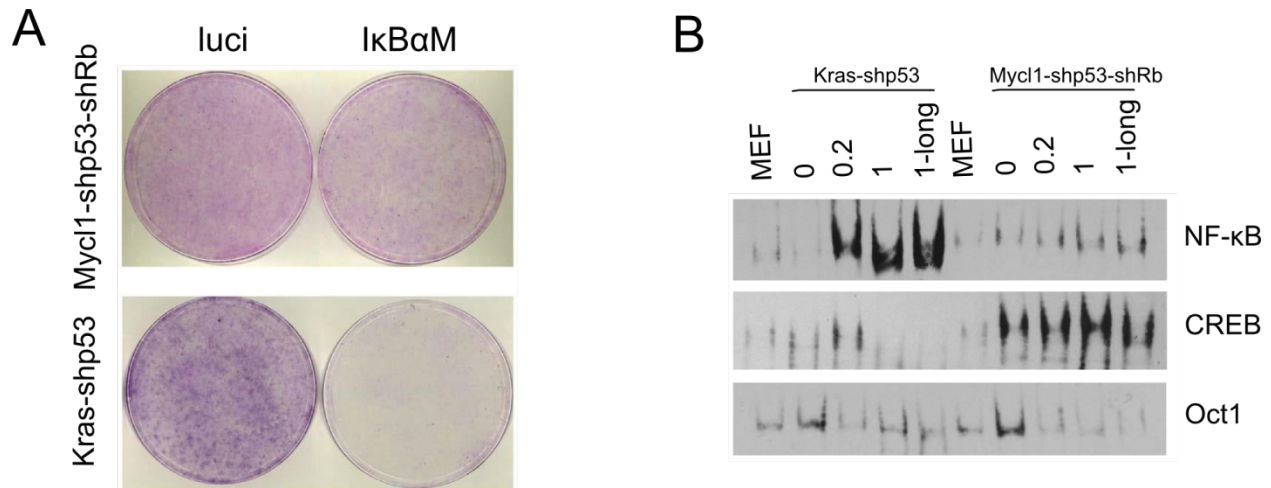

**Supplementary Figure S3. Kras-induced but not Mycl1-induced transformation relies on NF-κB activity for survival.** (A) MEFs derived from m2rtTA mouse line were infected with TRE-luci-KrasG12D-shp53 vector, TRE-IκBαM-KrasG12D-shp53, TRE-luci-Mycl1-shp53-shRb, or TRE-IκBαM-Mycl1-shp53-shRb vector. They were cultured in the presence of doxycycline for 7 days and stained with crystal violet for visualization. The results indicated that KrasG12D-shp53 induced transformation requires NF-κB activity, while Mycl1-shp53-shRb induced transformation doesn't. (B) EMSA showing MEFs transformed with Kras-shp53 vector had high NF-κB activity, while MEFs transformed with Mycl1-shp53-shRb vector had higher CREB activity.
