# Supplementary material
Source: PubMed Central journal article supplement (PMC5932136)
Supplement: NIHMS941141-supplement-4.pdf [file NIHMS941141-supplement-4.pdf]

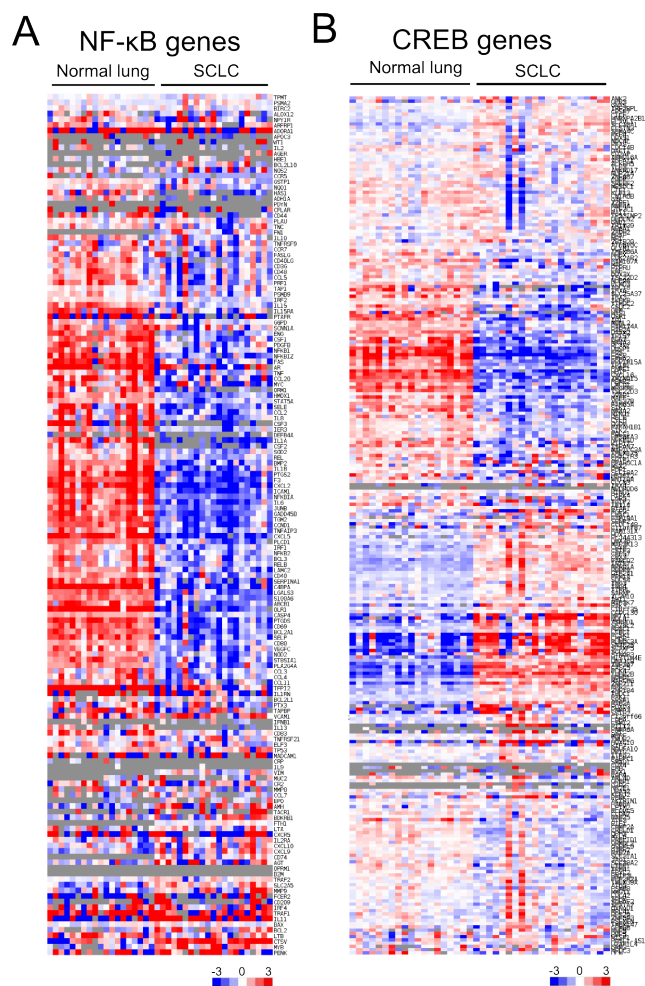

**Supplementary Figure S4. NF- $\kappa$ B and CREB activity in human SCLC samples.** Human SCLC RNAseq data were kindly shared by Dr. Seshagiri group (*Nat. Genet.* 2012. **44**:1111-1116). Heatmap of the expression values of 153 NF- $\kappa$ B target genes (**A**) and 264 CREB target genes (**B**) in normal lungs and SCLC primary tumors was shown.
