# Supplementary material
Source: PubMed Central journal article supplement (PMC5932136)
Supplement: NIHMS941141-supplement-5.pdf [file NIHMS941141-supplement-5.pdf]

**Supplementary Table S1. Status of CREB and NF- $\kappa$ B pathway activation in human lung cancers.** Phospho-CREB and p65 expression was examined in human lung cancer samples (10 SCLCs and 10 adenocarcinomas). The results indicated that SCLC has high CREB but low NF- $\kappa$ B activity while adenocarcinoma has high NF- $\kappa$ B but moderate CREB activity. In general, SCLC has higher mitotic index (Ki67) than adenocarcinoma.

| Case No.                   | CREB-p |       | NF- $\kappa$ B (p65) |       | Ki67   |       |
|----------------------------|--------|-------|----------------------|-------|--------|-------|
|                            | Normal | Tumor | Normal               | Tumor | Normal | Tumor |
| <b>SCLC</b>                |        |       |                      |       |        |       |
| 1                          | -      | +     | +                    | +     | -      | +++   |
| 2                          | -      | +     | -                    | -     | -      | ++    |
| 3                          | -      | ++    | -                    | +     | -      | +++   |
| 4                          | -      | +     | -                    | +     | -      | +++   |
| 5                          | +      | +     | ++                   | -     | -      | +++   |
| 6                          | +      | ++    | +                    | -     | -      | +++   |
| 7                          | -      | ++    | -                    | +     | -      | +     |
| 8                          | +      | +++   | +                    | -     | -      | +++   |
| 9                          | +      | ++    | +                    | +     | -      | +++   |
| 10                         | +      | +++   | +                    | -     | -      | +++   |
| <b>Lung adenocarcinoma</b> |        |       |                      |       |        |       |
| 1                          | +      | +++   | -                    | -     | -      | +     |
| 2                          | -      | -     | -                    | +     | -      | +     |
| 3                          | -      | -     | +                    | +++   | -      | ++    |
| 4                          | +      | ++    | -                    | +++   | -      | +     |
| 5                          | -      | +     | -                    | ++    | -      | +     |
| 6                          | +      | -     | -                    | ++    | -      | +     |
| 7                          | ++     | +     | +                    | +++   | -      | ++    |
| 8                          | -      | +     | +                    | +++   | -      | +     |
