# Supplementary material
Source: PubMed Central journal article supplement (PMC5932136)
Supplement: NIHMS941141-supplement-6.pdf [file NIHMS941141-supplement-6.pdf]

**Supplementary Table S2. PCR primer sets used in the study.**

| <i>Gene</i> | <i>Forward primer</i> | <i>Reverse primer</i>   |
|-------------|-----------------------|-------------------------|
| Mycl        | ACGGCACTCCTAGTCTGGAA  | TCCAGAGATCGCCTCTTCTC    |
| Nfib        | TGAGGCAGCTTCACCTACAG  | AGGATGGGTCTCTTGGGCTTA   |
| Myc         | ATGCCCTCAACGTGAACTTC  | GTCGCAGATGAAATAGGGCTG   |
| Mycn        | CCTCACTCCTAATCCGGTCAT | GTGCTGTAGTTTTTCGTTCACTG |
| Gapdh       | TGACCACAGTCCATGCCATC  | GACGGACACATTGGGGGTAG    |
| Ascl1       | GCAACCGGGTCAAGTTGGT   | GTCGTTGGAGTAGTTGGGGG    |
| Calca       | GAGGGCTCTAGCTTGGACAG  | AAGGTGTGAAACTTGTTGAGGT  |
| Ncam1       | ACCACCGTCACCACTAACTCT | TGGGGCAATACTGGAGGTCA    |
| Syp         | CAGTCCGGGTGGTCAAGG    | ACTCTCCGTCTTGTTGGCAC    |
| Chga        | ATCCTCTCTATCCTGCGACAC | GGGCTCTGGTTCTCAAACACT   |
